# Supplementary material for: Telehealth Parenting Program and Salivary Epigenetic Biomarkers in Preschool Children With Developmental Delay: NIMHD Social Epigenomics Program
Source: PubMed Central journal article supplement (PMC11287424; doi:10.1001/jamanetworkopen.2024.24815), 2024-07-29
Supplement: jamanetwopen-e2424815-s002.pdf [file jamanetwopen-e2424815-s002.pdf]

## Data Sharing Statement

Merrill. Telehealth Parenting Program and Salivary Epigenetic Biomarkers in Preschool Children With Developmental Delay. *JAMA Netw Open*. Published July 29, 2024.  
doi:10.1001/jamanetworkopen.2024.24815

### Data

**Data available:** Yes

**Data types:** Deidentified participant data

**How to access data:** [justin.parent@uri.edu](mailto:justin.parent@uri.edu)

**When available:** With publication

### Supporting Documents

**Document types:** Statistical/analytic code

**How to access documents:** [justin.parent@uri.edu](mailto:justin.parent@uri.edu)

**When available:** With publication

### Additional Information

**Who can access the data:** anyone requesting the data

**Types of analyses:** For confirmation or replication of results or pre-approved analysis via a data-sharing agreement

**Mechanisms of data availability:** With a signed data access agreement
